# Supplementary material for: AR alterations inform circulating tumor DNA detection in metastatic castration resistant prostate cancer patients
Source: Springer Nature journal article supplement (doi:10.1038/s41467-024-54847-1), 2024-12-11
Supplement: MOESM1 [file 41467_2024_54847_MOESM1_ESM.pdf]

**Supplementary Table 1.** Clinical characteristics of A031201 patients with and without cfDNA-seq data available.

|                         | cfDNA-seq data<br>(N=776) | No cfDNA-seq data<br>(N=535) | Total<br>(N=1311)       |
|-------------------------|---------------------------|------------------------------|-------------------------|
| <b>Age</b>              |                           |                              |                         |
| Median (Q1, Q3)         | 71.0 (65.0, 78.0)         | 72.0 (66.0, 78.0)            | 71.0 (65.0, 78.0)       |
| <b>PSA_log</b>          |                           |                              |                         |
| Median (Q1, Q3)         | 3.12 (2.22, 4.19)         | 3.26 (2.30, 4.32)            | 3.17 (2.25, 4.25)       |
| Missing                 | 0 (0%)                    | 1 (0.2%)                     | 1 (0.1%)                |
| <b>HGB</b>              |                           |                              |                         |
| Median (Q1, Q3)         | 12.9 (12.0, 13.7)         | 13.0 (12.1, 13.9)            | 13.0 (12.0, 13.8)       |
| <b>ALB</b>              |                           |                              |                         |
| Median (Q1, Q3)         | 4.00 (3.80, 4.30)         | 4.10 (3.80, 4.30)            | 4.00 (3.80, 4.30)       |
| Missing                 | 2 (0.3%)                  | 1 (0.2%)                     | 3 (0.2%)                |
| <b>AlkPhos_log</b>      |                           |                              |                         |
| Median (Q1, Q3)         | 4.49 (4.26, 4.87)         | 4.53 (4.22, 4.88)            | 4.50 (4.25, 4.88)       |
| Missing                 | 1 (0.1%)                  | 3 (0.6%)                     | 4 (0.3%)                |
| <b>ANC</b>              |                           |                              |                         |
| Median (Q1, Q3)         | 4.10 (3.20, 5.10)         | 3.71 (2.97, 4.73)            | 3.90 (3.10, 4.90)       |
| Missing                 | 2 (0.3%)                  | 3 (0.6%)                     | 5 (0.4%)                |
| <b>LDH_log</b>          |                           |                              |                         |
| Median (Q1, Q3)         | 5.28 (5.11, 5.49)         | 5.27 (5.13, 5.48)            | 5.27 (5.12, 5.48)       |
| Missing                 | 24 (3.1%)                 | 22 (4.1%)                    | 46 (3.5%)               |
| <b>riskscore</b>        |                           |                              |                         |
| Median (Q1, Q3)         | -0.361 (-0.574, -0.0968)  | -0.339 (-0.563, -0.122)      | -0.355 (-0.571, -0.103) |
| Missing                 | 3 (0.4%)                  | 4 (0.7%)                     | 7 (0.5%)                |
| <b>Bone</b>             |                           |                              |                         |
| No                      | 142 (18.3%)               | 85 (15.9%)                   | 227 (17.3%)             |
| Yes                     | 634 (81.7%)               | 450 (84.1%)                  | 1084 (82.7%)            |
| <b>Liver</b>            |                           |                              |                         |
| No                      | 745 (96.0%)               | 510 (95.3%)                  | 1255 (95.7%)            |
| Yes                     | 31 (4.0%)                 | 25 (4.7%)                    | 56 (4.3%)               |
| <b>Lung</b>             |                           |                              |                         |
| No                      | 690 (88.9%)               | 470 (87.9%)                  | 1160 (88.5%)            |
| Yes                     | 86 (11.1%)                | 65 (12.1%)                   | 151 (11.5%)             |
| <b>Nodal</b>            |                           |                              |                         |
| No                      | 394 (50.8%)               | 287 (53.6%)                  | 681 (51.9%)             |
| Yes                     | 382 (49.2%)               | 248 (46.4%)                  | 630 (48.1%)             |
| <b>Other_metastasis</b> |                           |                              |                         |
| No                      | 710 (91.5%)               | 483 (90.3%)                  | 1193 (91.0%)            |
| Yes                     | 66 (8.5%)                 | 52 (9.7%)                    | 118 (9.0%)              |
| <b>Race</b>             |                           |                              |                         |
| Black                   | 86 (11.1%)                | 76 (14.2%)                   | 162 (12.4%)             |
| Other                   | 35 (4.5%)                 | 26 (4.9%)                    | 61 (4.7%)               |
| White                   | 655 (84.4%)               | 433 (80.9%)                  | 1088 (83.0%)            |

**Supplementary Table 1 (continued)**

|                                                     |             |             |              |
|-----------------------------------------------------|-------------|-------------|--------------|
| <b>Ethnicity</b>                                    |             |             |              |
| Hispanic or Latino                                  | 29 (3.7%)   | 31 (5.8%)   | 60 (4.6%)    |
| Not Hispanic or Latino                              | 720 (92.8%) | 486 (90.8%) | 1206 (92.0%) |
| Not reported: Patient refused or data not available | 15 (1.9%)   | 10 (1.9%)   | 25 (1.9%)    |
| Unknown: Patient is unsure of their ethnicity       | 12 (1.5%)   | 8 (1.5%)    | 20 (1.5%)    |
| <b>Prior_Chemotherapy</b>                           |             |             |              |
| No                                                  | 759 (97.8%) | 525 (98.1%) | 1284 (97.9%) |
| Yes                                                 | 17 (2.2%)   | 10 (1.9%)   | 27 (2.1%)    |
| <b>Halabi_Risk_Factor</b>                           |             |             |              |
| High                                                | 124 (16.0%) | 81 (15.1%)  | 205 (15.6%)  |
| Intermediate                                        | 267 (34.4%) | 196 (36.6%) | 463 (35.3%)  |
| Low                                                 | 376 (48.5%) | 255 (47.7%) | 631 (48.1%)  |
| Missing                                             | 9 (1.2%)    | 3 (0.6%)    | 12 (0.9%)    |
| <b>Prior_Tumor</b>                                  |             |             |              |
| No                                                  | 86 (11.1%)  | 47 (8.8%)   | 133 (10.1%)  |
| Yes                                                 | 690 (88.9%) | 488 (91.2%) | 1178 (89.9%) |
| <b>Gleason_Score</b>                                |             |             |              |
| Greater than or equal to eight                      | 442 (57.0%) | 285 (53.3%) | 727 (55.5%)  |
| Less than or equal to six                           | 77 (9.9%)   | 45 (8.4%)   | 122 (9.3%)   |
| Missing                                             | 62 (8.0%)   | 56 (10.5%)  | 118 (9.0%)   |
| Seven                                               | 195 (25.1%) | 149 (27.9%) | 344 (26.2%)  |
| <b>PS</b>                                           |             |             |              |
| 0                                                   | 457 (58.9%) | 306 (57.2%) | 763 (58.2%)  |
| 1                                                   | 319 (41.1%) | 229 (42.8%) | 548 (41.8%)  |
| <b>Opioid</b>                                       |             |             |              |
| 0                                                   | 647 (83.4%) | 434 (81.1%) | 1081 (82.5%) |
| 1                                                   | 129 (16.6%) | 101 (18.9%) | 230 (17.5%)  |
| <b>BSL</b>                                          |             |             |              |
| No                                                  | 461 (59.4%) | 320 (59.8%) | 781 (59.6%)  |
| Yes                                                 | 315 (40.6%) | 215 (40.2%) | 530 (40.4%)  |
| <b>LDH_ULN</b>                                      |             |             |              |
| 0                                                   | 599 (77.2%) | 411 (76.8%) | 1010 (77.0%) |
| 1                                                   | 177 (22.8%) | 124 (23.2%) | 301 (23.0%)  |

PSA, prostate specific antigen; HGB, hemoglobin; ALB, albumin; AlkPhos, alkaline phosphatase; ANC, absolute neutrophil count; LDH, lactate dehydrogenase; PS, performance status; ULN, upper limit of normal. 'N' refers to the number of patients.

**Supplementary Table 2.** Clinical characteristics of A031201 patients based on ctDNA group status.

|                                                     | group1<br>(N=200)       | group2<br>(N=256)        | group3<br>(N=320)       | P-value<br>Group 1 vs. 3 | P-value<br>Group 2 vs. 3 |
|-----------------------------------------------------|-------------------------|--------------------------|-------------------------|--------------------------|--------------------------|
| <b>Age</b>                                          |                         |                          |                         |                          |                          |
| Median (Q1, Q3)                                     | 70.0 (65.0, 76.0)       | 71.0 (64.0, 78.3)        | 71.0 (66.0, 77.0)       |                          |                          |
| <b>PSA_log</b>                                      |                         |                          |                         |                          |                          |
| Median (Q1, Q3)                                     | 3.44 (2.50, 4.57)       | 3.26 (2.29, 4.39)        | 2.77 (1.85, 3.72)       |                          |                          |
| <b>HGB</b>                                          |                         |                          |                         |                          |                          |
| Median (Q1, Q3)                                     | 12.6 (11.7, 13.5)       | 12.7 (11.7, 13.7)        | 13.2 (12.3, 13.9)       |                          |                          |
| <b>ALB</b>                                          |                         |                          |                         |                          |                          |
| Median (Q1, Q3)                                     | 4.00 (3.70, 4.30)       | 4.00 (3.80, 4.30)        | 4.10 (3.90, 4.30)       |                          |                          |
| Missing                                             | 1 (0.5%)                | 0 (0%)                   | 1 (0.3%)                |                          |                          |
| <b>AlkPhos_log</b>                                  |                         |                          |                         |                          |                          |
| Median (Q1, Q3)                                     | 4.70 (4.37, 5.30)       | 4.52 (4.28, 5.03)        | 4.38 (4.20, 4.66)       |                          |                          |
| Missing                                             | 0 (0%)                  | 1 (0.4%)                 | 0 (0%)                  |                          |                          |
| <b>ANC</b>                                          |                         |                          |                         |                          |                          |
| Median (Q1, Q3)                                     | 4.13 (3.26, 5.30)       | 4.10 (3.25, 5.00)        | 3.95 (3.10, 4.92)       |                          |                          |
| Missing                                             | 1 (0.5%)                | 0 (0%)                   | 1 (0.3%)                |                          |                          |
| <b>LDH_log</b>                                      |                         |                          |                         |                          |                          |
| Median (Q1, Q3)                                     | 5.37 (5.19, 5.65)       | 5.27 (5.12, 5.48)        | 5.25 (5.06, 5.42)       |                          |                          |
| Missing                                             | 10 (5.0%)               | 5 (2.0%)                 | 9 (2.8%)                |                          |                          |
| <b>riskscore</b>                                    |                         |                          |                         |                          |                          |
| Median (Q1, Q3)                                     | -0.204 (-0.499, 0.0367) | -0.300 (-0.520, -0.0565) | -0.434 (-0.637, -0.244) | < 0.001                  | < 0.001                  |
| Missing                                             | 1 (0.5%)                | 1 (0.4%)                 | 1 (0.3%)                |                          |                          |
| <b>Bone</b>                                         |                         |                          |                         |                          |                          |
| No                                                  | 32 (16.0%)              | 39 (15.2%)               | 71 (22.2%)              |                          |                          |
| Yes                                                 | 168 (84.0%)             | 217 (84.8%)              | 249 (77.8%)             |                          |                          |
| <b>Liver</b>                                        |                         |                          |                         |                          |                          |
| No                                                  | 189 (94.5%)             | 243 (94.9%)              | 313 (97.8%)             |                          |                          |
| Yes                                                 | 11 (5.5%)               | 13 (5.1%)                | 7 (2.2%)                |                          |                          |
| <b>Lung</b>                                         |                         |                          |                         |                          |                          |
| No                                                  | 175 (87.5%)             | 229 (89.5%)              | 286 (89.4%)             |                          |                          |
| Yes                                                 | 25 (12.5%)              | 27 (10.5%)               | 34 (10.6%)              |                          |                          |
| <b>Nodal</b>                                        |                         |                          |                         |                          |                          |
| No                                                  | 98 (49.0%)              | 132 (51.6%)              | 164 (51.3%)             |                          |                          |
| Yes                                                 | 102 (51.0%)             | 124 (48.4%)              | 156 (48.8%)             |                          |                          |
| <b>Other_metastasis</b>                             |                         |                          |                         |                          |                          |
| No                                                  | 181 (90.5%)             | 228 (89.1%)              | 301 (94.1%)             |                          |                          |
| Yes                                                 | 19 (9.5%)               | 28 (10.9%)               | 19 (5.9%)               |                          |                          |
| <b>Race</b>                                         |                         |                          |                         |                          |                          |
| Black                                               | 27 (13.5%)              | 34 (13.3%)               | 25 (7.8%)               |                          |                          |
| Other                                               | 13 (6.5%)               | 7 (2.7%)                 | 15 (4.7%)               |                          |                          |
| White                                               | 160 (80.0%)             | 215 (84.0%)              | 280 (87.5%)             |                          |                          |
| <b>Ethnicity</b>                                    |                         |                          |                         |                          |                          |
| Hispanic or Latino                                  | 7 (3.5%)                | 8 (3.1%)                 | 14 (4.4%)               |                          |                          |
| Not Hispanic or Latino                              | 186 (93.0%)             | 237 (92.6%)              | 297 (92.8%)             |                          |                          |
| Not reported: Patient refused or data not available | 4 (2.0%)                | 5 (2.0%)                 | 6 (1.9%)                |                          |                          |
| Unknown: Patient is unsure of their ethnicity       | 3 (1.5%)                | 6 (2.3%)                 | 3 (0.9%)                |                          |                          |
| <b>Prior_Chemotherapy</b>                           |                         |                          |                         |                          |                          |
| No                                                  | 195 (97.5%)             | 250 (97.7%)              | 314 (98.1%)             |                          |                          |
| Yes                                                 | 5 (2.5%)                | 6 (2.3%)                 | 6 (1.9%)                |                          |                          |
| <b>Halabi_Risk_Factor</b>                           |                         |                          |                         |                          |                          |
| High                                                | 47 (23.5%)              | 52 (20.3%)               | 25 (7.8%)               | < 0.001                  | < 0.001                  |
| Intermediate                                        | 74 (37.0%)              | 95 (37.1%)               | 98 (30.6%)              |                          |                          |
| Low                                                 | 74 (37.0%)              | 107 (41.8%)              | 195 (60.9%)             |                          |                          |
| Missing                                             | 5 (2.5%)                | 2 (0.8%)                 | 2 (0.6%)                |                          |                          |
| <b>Prior_Tumor</b>                                  |                         |                          |                         |                          |                          |
| No                                                  | 24 (12.0%)              | 27 (10.5%)               | 35 (10.9%)              |                          |                          |
| Yes                                                 | 176 (88.0%)             | 229 (89.5%)              | 285 (89.1%)             |                          |                          |
| <b>Gleason_Score</b>                                |                         |                          |                         |                          |                          |
| Greater than or equal to eight                      | 127 (63.5%)             | 148 (57.8%)              | 167 (52.2%)             |                          |                          |
| Less than or equal to six                           | 15 (7.5%)               | 24 (9.4%)                | 38 (11.9%)              |                          |                          |
| Seven                                               | 47 (23.5%)              | 61 (23.8%)               | 87 (27.2%)              |                          |                          |
| Missing                                             | 11 (5.5%)               | 23 (9.0%)                | 28 (8.8%)               |                          |                          |

**Supplementary Table 2 (continued)**

|                |             |             |             |  |
|----------------|-------------|-------------|-------------|--|
| <b>PS</b>      |             |             |             |  |
| 0              | 118 (59.0%) | 135 (52.7%) | 204 (63.8%) |  |
| 1              | 82 (41.0%)  | 121 (47.3%) | 116 (36.3%) |  |
| <b>Opioid</b>  |             |             |             |  |
| 0              | 159 (79.5%) | 208 (81.3%) | 280 (87.5%) |  |
| 1              | 41 (20.5%)  | 48 (18.8%)  | 40 (12.5%)  |  |
| <b>BSL</b>     |             |             |             |  |
| No             | 111 (55.5%) | 149 (58.2%) | 201 (62.8%) |  |
| Yes            | 89 (44.5%)  | 107 (41.8%) | 119 (37.2%) |  |
| <b>LDH_ULN</b> |             |             |             |  |
| 0              | 133 (66.5%) | 195 (76.2%) | 271 (84.7%) |  |
| 1              | 67 (33.5%)  | 61 (23.8%)  | 49 (15.3%)  |  |

PSA, prostate specific antigen; HGB, hemoglobin; ALB, albumin; AlkPhos, alkaline phosphatase; ANC, absolute neutrophil count; LDH, lactate dehydrogenase; PS, performance status; ULN, upper limit of normal. 'N' refers to the number of patients.

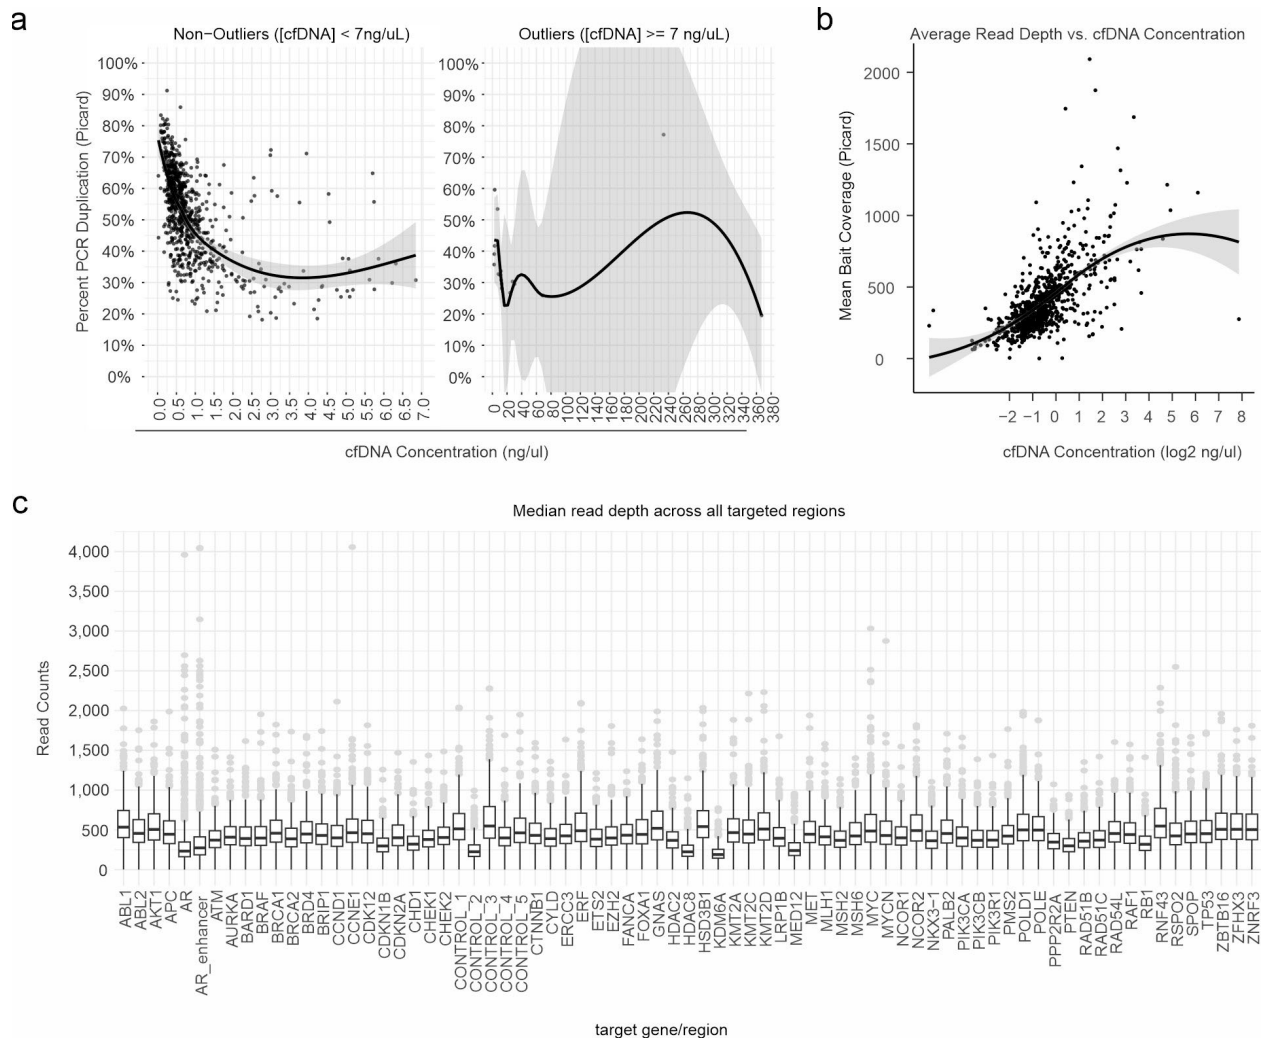

**Supplementary Figure 1. DNA-sequencing metrics across 776 cfDNA specimens. (a)** Scatterplot of percent PCR duplication vs. concentration of cfDNA used as input for DNA-seq library preparation across 776 cfDNA specimens. Loess trendline and 95% confidence interval are illustrated. **(b)** Scatterplot of average unique DNA-seq read coverage for all baits on the targeted DNA-seq panel vs. concentration of cfDNA used as input for DNA-seq library preparation across all 776 cfDNA specimens. Loess trendline and 95% confidence interval are illustrated. **(c)** Depth of unique DNA-seq reads for targeted genes and genomic regions across 776 cfDNA specimens. Boxes represent median and interquartile range. Whiskers represent 1.5X interquartile range. Outliers are illustrated as gray points.

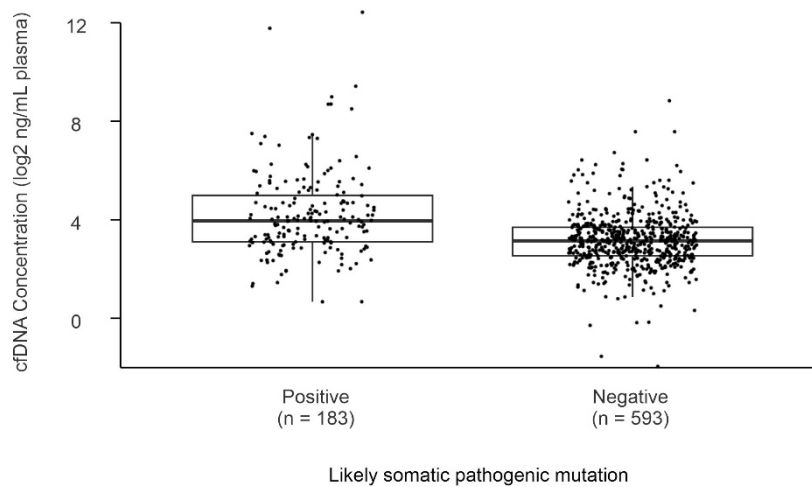

**Supplementary Figure 2. cfDNA yields in cfDNA specimens harboring or lacking likely somatic pathogenic mutations.** Boxplot of cfDNA yields (ng of cfDNA isolated per mL of plasma) for samples stratified by whether they harbor a likely somatic pathogenic mutation (n = 183) or lack detection of a likely somatic pathogenic mutation (n = 593). Boxes represent median and interquartile range. Whiskers represent 1.5X interquartile range. 'n' refers to the number of patient samples.

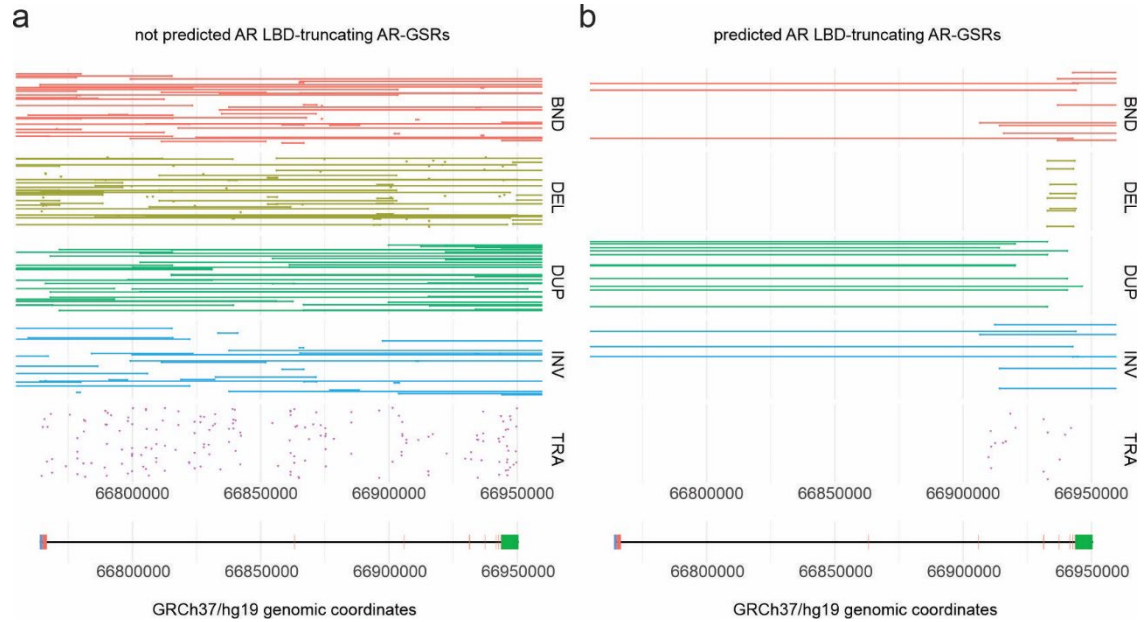

**Supplementary Figure 3. Functional annotation of AR-GSRs. (a&b)**

Illustrations of breakpoint locations and genomic architectures for indicated structural variant classes (BND = breakend, DEL = deletion, DUP = duplication, INV = inversion, TRA = translocation). The *AR* gene is illustrated at the bottom. *AR*-GSRs are split into 2 groups based on whether they are (a) not predicted to truncate the AR ligand binding domain (LBD) or (B) likely to truncate the AR ligand binding domain.

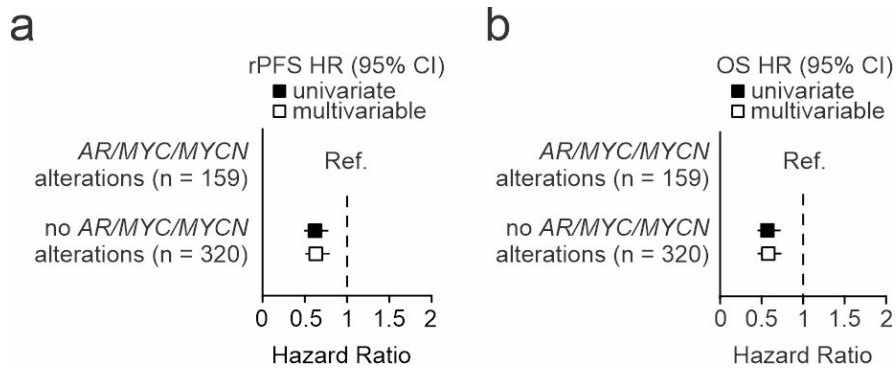

**Supplementary Figure 4. Prognostic importance of *AR/MYC/MYCN* alterations in aneuploidy-low cfDNA specimens. (a&b)** Forest plots illustrating hazard ratio (squares) and 95% confidence intervals (horizontal lines) for (a) radiographic progression (rPFS) and (b) death (OS) in ctDNA aneuploidy-low patients lacking pathogenic mutations but demonstrating alterations in *AR*, *MYC*, and/or *MYCN*. Multivariable analysis is adjusted for ctDNA aneuploidy fraction. ‘n’ refers to the number of patients.



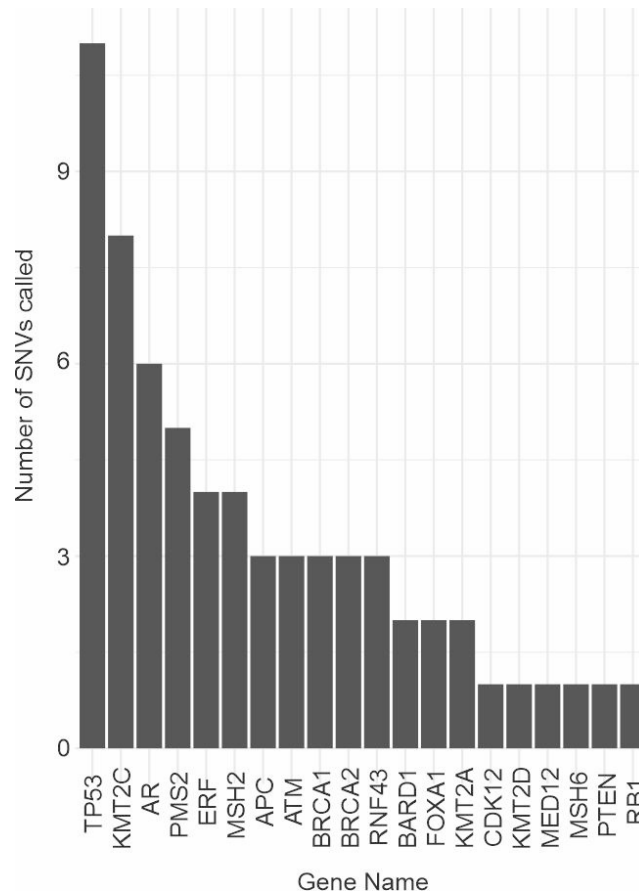

**Supplementary Figure 5. ctDNA-defining mutations in ctDNA aneuploidy-low Group 2.** Genes from the 39 samples in ctDNA aneuploidy-low Group 2 affected by a likely-somatic pathogenic mutation but lacking AR and/or AR enhancer copy gain, MYC and/or MYCN copy gain, or an AR-GSR.

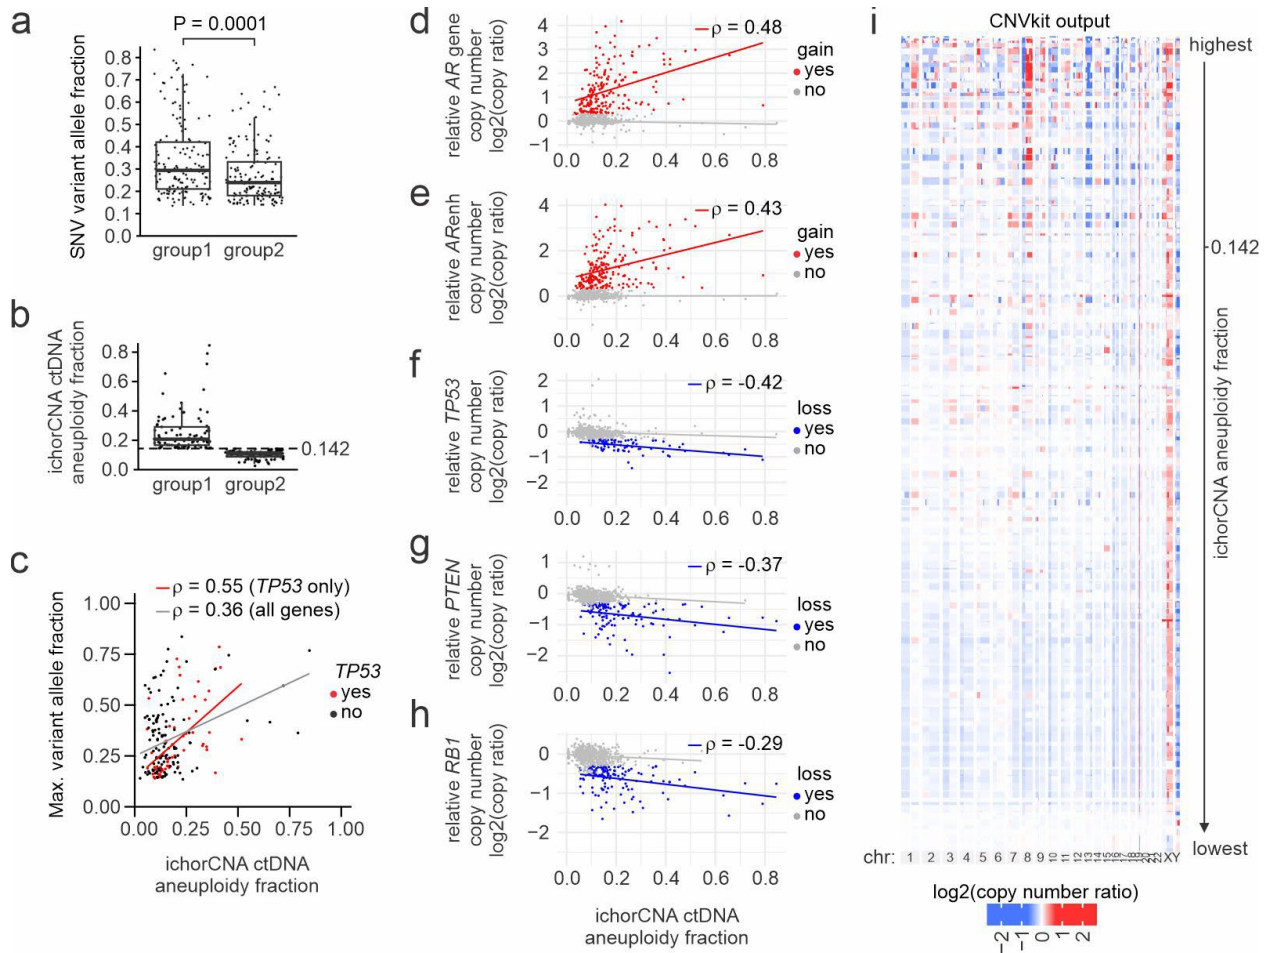

**Supplementary Figure 6. Benchmarking ichorCNA aneuploidy fraction against alternative inputs for calculating ctDNA fraction. (a)** Boxplot of variant allele fractions (VAFs) of pathogenic mutations detected in ctDNA-positive samples classified as ctDNA aneuploidy-high (Group 1) or ctDNA aneuploidy-low (Group 2). The p-value is determined from a Mann Whitney U-test. Boxes represent median and interquartile range. Whiskers represent 1.5X interquartile range. **(b)** Boxplot of ichorCNA ctDNA aneuploidy fraction for samples as in (A). Boxes represent median and interquartile range. Whiskers represent 1.5X interquartile range. **(c)** Scatterplot of ichorCNA ctDNA aneuploidy fraction vs. maximum variant allele fraction for  $n = 183$  cfDNA specimens harboring a pathogenic mutation. The most frequently-mutated gene (*TP53*) is denoted by red dots. Trendlines and Pearson correlations coefficients are shown for all genes (gray line) or for *TP53* only (red line). **(d-h)** Scatterplot of ichorCNA ctDNA aneuploidy fraction vs. log2 copy ratios for (d) *AR*, (e) *AR* enhancer, (f) *TP53*, (g) *PTEN*, and (h) *RB1*. Pearson correlation coefficients ( $\rho$ ) are shown for samples with gain (red) or loss (blue) only. **(i)** Copy number alterations in  $n = 776$  cfDNA specimens derived from analysis by CNVkit. cfDNA samples are ordered top to bottom by decreasing ichorCNA ctDNA aneuploidy fraction.

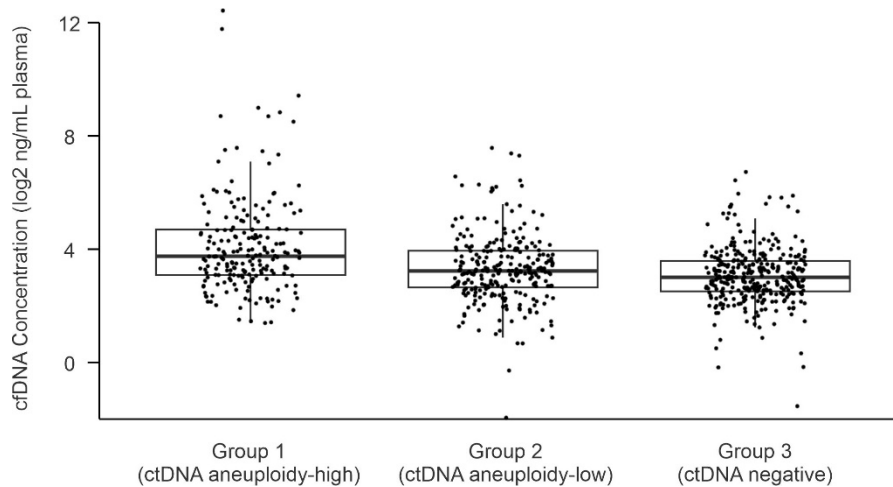

**Supplementary Figure 7. cfDNA yields based on ctDNA group status.** Boxplot of cfDNA yields for samples classified as belonging to ctDNA aneuploidy-high Group 1 (n = 200), ctDNA aneuploidy-low Group 2 (n = 256), or ctDNA-negative Group 3 (n = 320). Boxes represent median and interquartile range. Whiskers represent 1.5X interquartile range. 'n' refers to the number of patient samples.

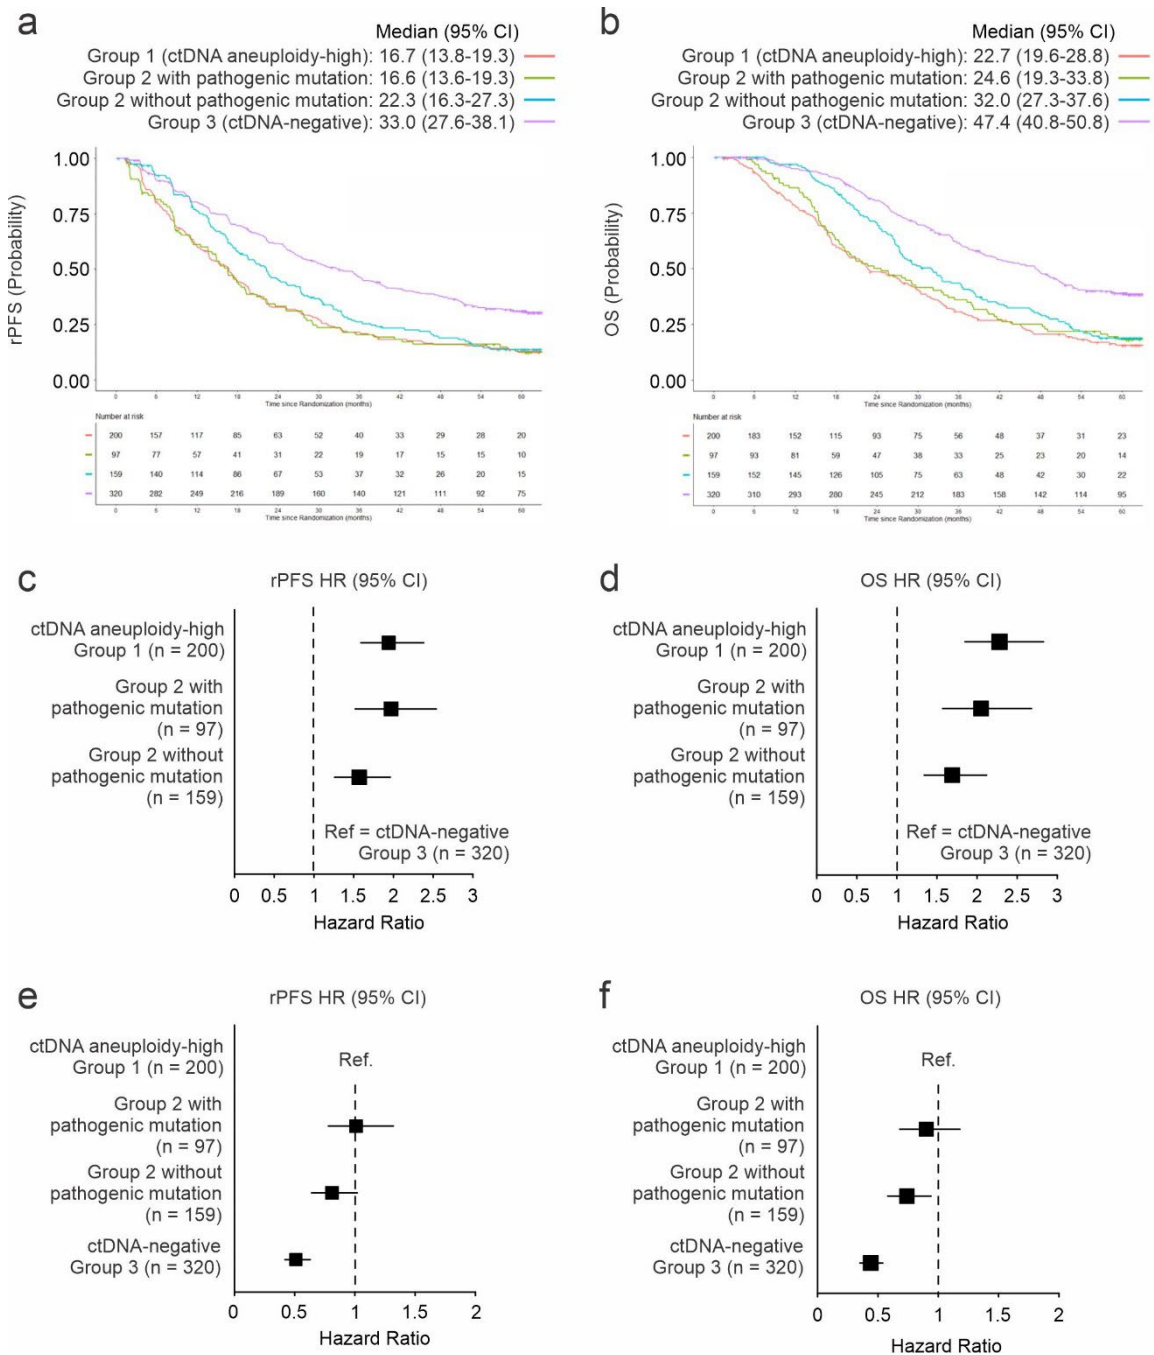

**Supplementary Figure 8. Prognostic evaluation of patients in ctDNA aneuploidy-low Group 2 stratified by presence/absence of a pathogenic mutation. (a&b)** Kaplan-Meier plots of (a) radiographic progression-free survival (rPFS) and (b) overall survival (OS) in ctDNA aneuploidy-positive and -low Groups 1-3. ctDNA-positive Group 2 patients are separated into subgroups containing (n = 97) or lacking (n = 159) a detectable pathogenic mutation. **(c&d)** Forest plots illustrating hazard ratio (squares) and 95% confidence intervals (horizontal lines) for (c) rPFS and (d) death (OS) in groups shown in a&b. Comparisons are relative to ctDNA-negative Group 3. 'n' refers to the number of patients. **(e&f)** Forest plots as in c&d, with hazard ratios relative to ctDNA-positive Group 1. 'n' refers to the number of patients.

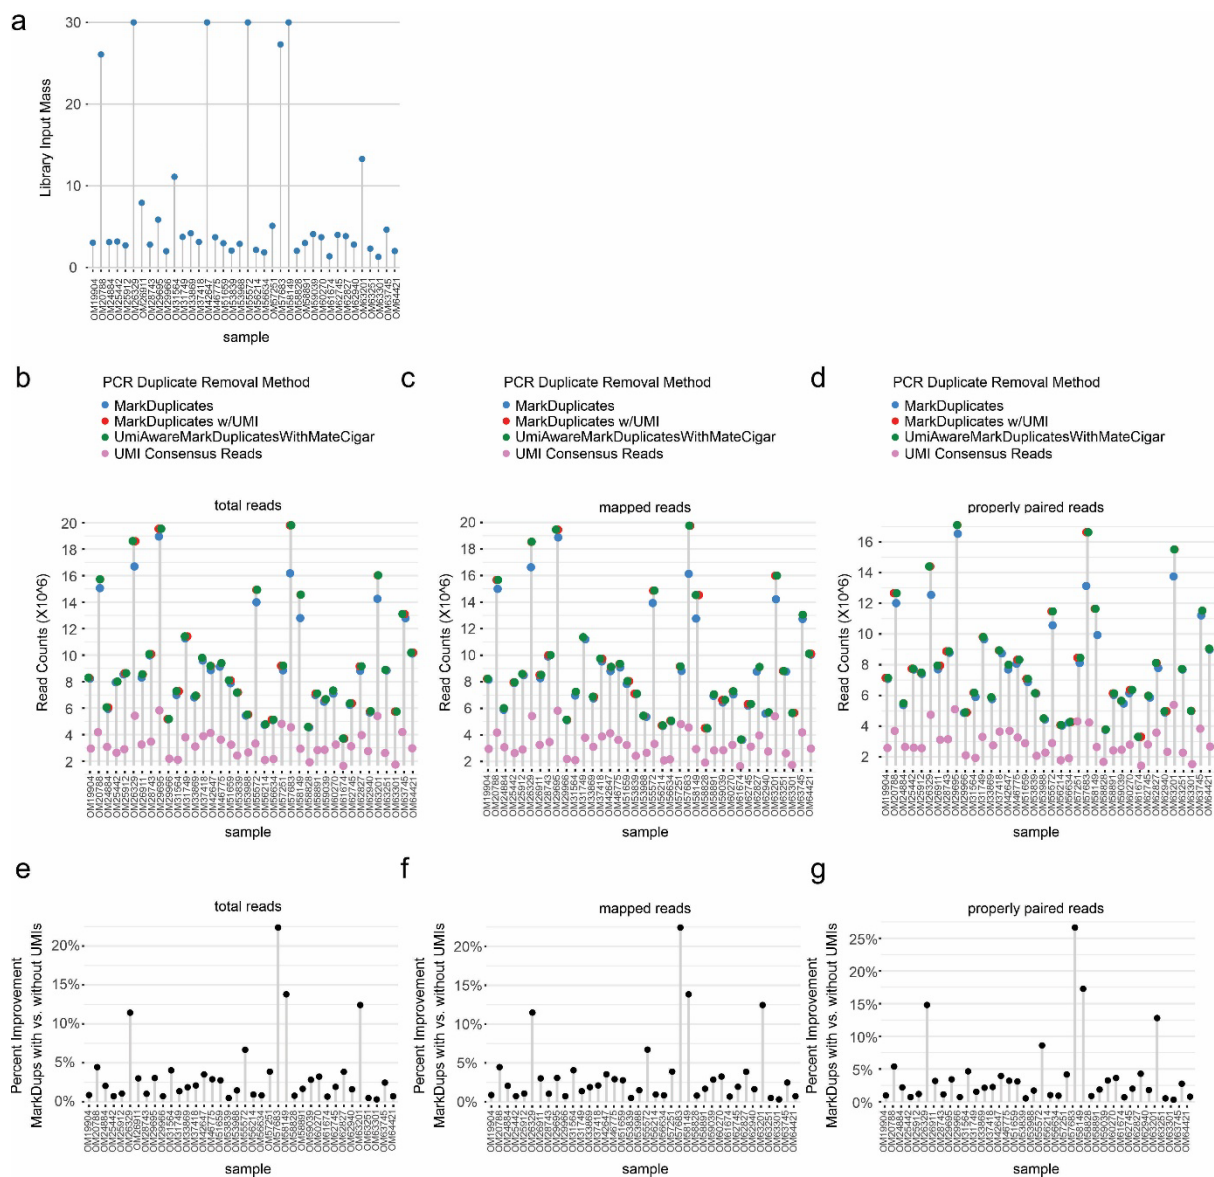

**Supplementary Figure 9. PCR duplicate removal strategies.** (a) Mass of DNA used as input for DNA-seq library preparation in a pilot DNA-seq study of 38 cfDNA samples. (b) Number of total DNA-seq reads remaining per sample after removal of PCR duplicates using Picard MarkDuplicates with default settings (blue), Picard MarkDuplicates with unique molecule index (UMI)-aware settings (red), Picard UmiAwareMarkDuplicatesWithMateCigar (green), or UMI Consensus Reads (pink). (c) Number of mapped DNA-seq reads remaining per sample after removal of PCR duplicates as in (b). (d) Number of mapped and properly-paired DNA-seq reads remaining per sample after removal of PCR duplicates as in (b). (e) Percent improvement in total DNA-seq reads remaining after removal of PCR duplicates using Picard MarkDuplicates with UMI-aware settings vs. Picard MarkDuplicates with default settings from (b). (f) Percent improvement in mapped DNA-seq reads remaining after removal of PCR duplicates using Picard MarkDuplicates with UMI-aware settings vs. Picard MarkDuplicates with default settings from (c). (g) Percent improvement in properly paired DNA-seq reads remaining after removal of PCR duplicates using Picard MarkDuplicates with UMI-aware settings vs. Picard MarkDuplicates with default settings from (d).
